# Supplementary material for: Responses to language barriers in consultations with refugees and asylum seekers: a telephone survey of Irish general practitioners
Source: Springer Nature journal article supplement (doi:10.1186/1471-2296-9-68), 2008-12-01
Supplement: Additional file 1 [file 1471-2296-9-68-s1.doc]

**Box 1 Summary of Questions in Telephone Survey**

Specifics of Questions Asked:

Questions determined whether some of their refugee and asylum seeking patients required language assistance and whether professional or informal interpreters were used.

Practitioners knowledge (names of services, sources of information, information about payment for services) of professional services

Practitioners use (access and quality of interpretation) of professional language interpretation services.

Views about the primary advantages and disadvantages of professional services

Practitioners views about primary advantage and disadvantage of informal interpreters

Views about the quality of informal interpreters

Preferences for professional or informal interpreters
